# Supplementary material for: Two unprecedented 3D metal–organic polyrotaxane frameworks based on a new flexible tri(imidazole) ligand
Source: Royal Society of Chemistry journal article supplement (doi:10.1039/c0ce00908c), 2011-01-01
Supplement: c0ce00908c.pdf [file c0ce00908c.pdf]

**Two unprecedented 3D metal-organic polyrotaxane frameworks  
based on a new flexible tri(imidazole) ligand**

Hua Wu,<sup>ab</sup> Hai-Yan Liu,<sup>a</sup> Bo Liu,<sup>a</sup> Jin Yang,<sup>\*a</sup> Ying-Ying Liu,<sup>a</sup> Jian-Fang Ma,<sup>\*a</sup>  
Yun-Yu Liu,<sup>a</sup> and Hong-Ye Bai<sup>a</sup>

<sup>a</sup> *Key Lab of Polyoxometalate Science, Department of Chemistry, Northeast Normal University, Changchun 130024, People's Republic of China*

<sup>b</sup> *Heilongjiang Agricultural College of Vocational Technology, Jiamusi, 154007, People's Republic of China*

\* Correspondence authors

E-mail: yangjinnenu@yahoo.com.cn (J. Yang)

E-mail: jianfangma@yahoo.com.cn (J.-F. Ma)

Fax: +86-431-85098620 (J.-F. Ma)

**Table S1.** Selected bond lengths [Å] and angles [deg] for **1** and **2**.<sup>[a]</sup>

---

| Compound 1            |            |                      |            |
|-----------------------|------------|----------------------|------------|
| Cd(1)-O(4)            | 2.690(6)   | Cd(1)-N(5)#1         | 2.309(7)   |
| Cd1-O2#2              | 2.671(9)   | Cd(1)-O(5)           | 2.239(5)   |
| Cd(1)-O(3)#2          | 2.310(6)   | Cd(1)-N(7)#3         | 2.312(7)   |
| Cd(1)-N(3)            | 2.346(8)   | N(5)#1-Cd(1)-N(3)    | 93.7(3)    |
| N(5)#1-Cd(1)-N(7)#3   | 91.8(3)    | N(5)#1-Cd(1)-O(3)#2  | 86.8(3)    |
| N(7)#3-Cd(1)-N(3)     | 174.2(3)   |                      |            |
| Compound 2            |            |                      |            |
| Cd(1)-N(7)            | 2.286(4)   | Cd(1)-N(7)#1         | 2.286(4)   |
| Cd(1)-N(5)#2          | 2.374(4)   | Cd(1)-N(5)#3         | 2.374(4)   |
| Cd(1)-Cl(1)#4         | 2.6695(13) | Cd(1)-Cl(1)#5        | 2.6695(13) |
| Cd(2)-O(1)            | 2.245(4)   | Cd(2)-N(3)           | 2.249(4)   |
| Cd(2)-O(3)            | 2.261(3)   | Cd(2)-O(4)           | 2.483(4)   |
| Cd(2)-O(2)            | 2.512(4)   | Cd(2)-Cl(1)          | 2.5367(14) |
| N(7)-Cd(1)-N(7)#1     | 180        | N(7)-Cd(1)-N(5)#2    | 89.29(15)  |
| N(7)#1-Cd(1)-N(5)#2   | 90.71(15)  | N(7)-Cd(1)-N(5)#3    | 89.29(15)  |
| N(7)#1-Cd(1)-N(5)#3   | 90.71(15)  | N(5)#2-Cd(1)-N(5)#3  | 180        |
| N(7)-Cd(1)-Cl(1)#4    | 88.64(12)  | N(7)#1-Cd(1)-Cl(1)#4 | 91.36(12)  |
| N(5)#2-Cd(1)-Cl(1)#4  | 95.80(11)  | N(5)#3-Cd(1)-Cl(1)#4 | 84.20(11)  |
| N(7)-Cd(1)-Cl(1)#5    | 91.36(12)  | N(7)#1-Cd(1)-Cl(1)#5 | 88.64(12)  |
| N(5)#2-Cd(1)-Cl(1)#5  | 84.20(11)  | N(5)#3-Cd(1)-Cl(1)#5 | 95.80(11)  |
| Cl(1)#4-Cd(1)-Cl(1)#5 | 180        |                      |            |

---

[a] Symmetry operations: for **1**: #1 -x+2, -y, -z+1; #2 x-1, y-1, z+1; #3 x+1, y+1, z-1; for **2**: #1 -x+3/2, y-1/2, -z+3/2; #2 x+1, y, z; #3 x, y-1, z.

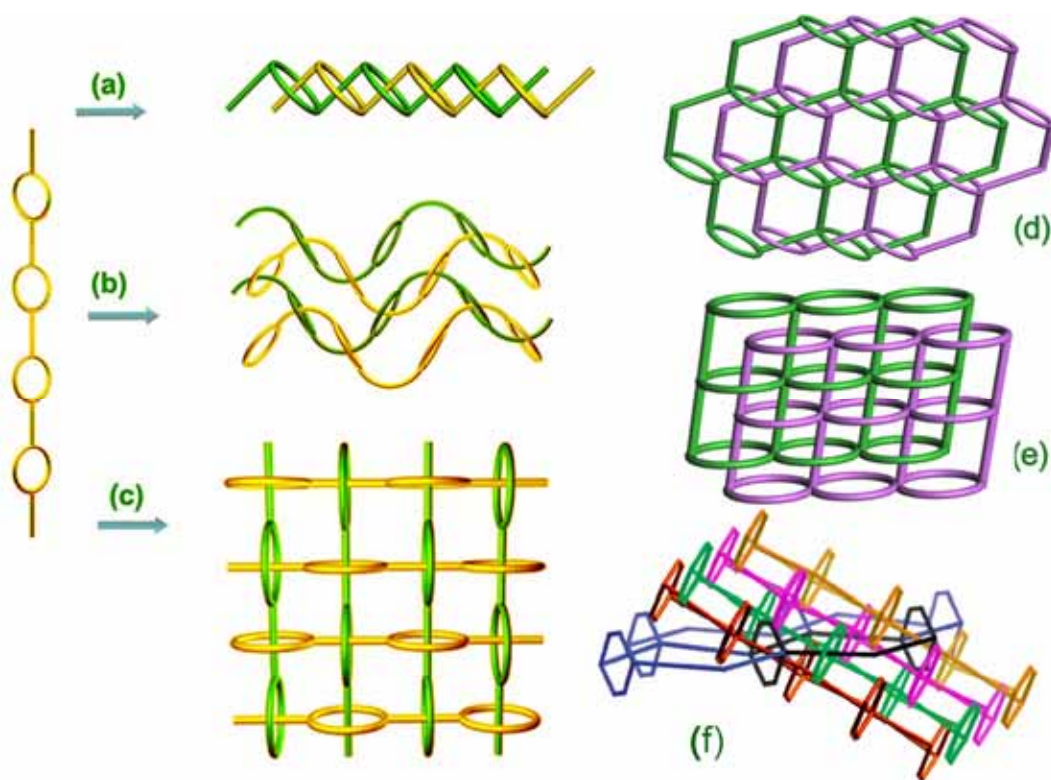

**Chart S1.** Schematic representations of the known (a) 1D  $\rightarrow$  1D, (b) inclined 1D  $\rightarrow$  2D, (c) parallel 1D  $\rightarrow$  2D, (d) and (e) parallel 2D  $\rightarrow$  2D, and (f) inclined 2D  $\rightarrow$  3D polyrotaxane networks.

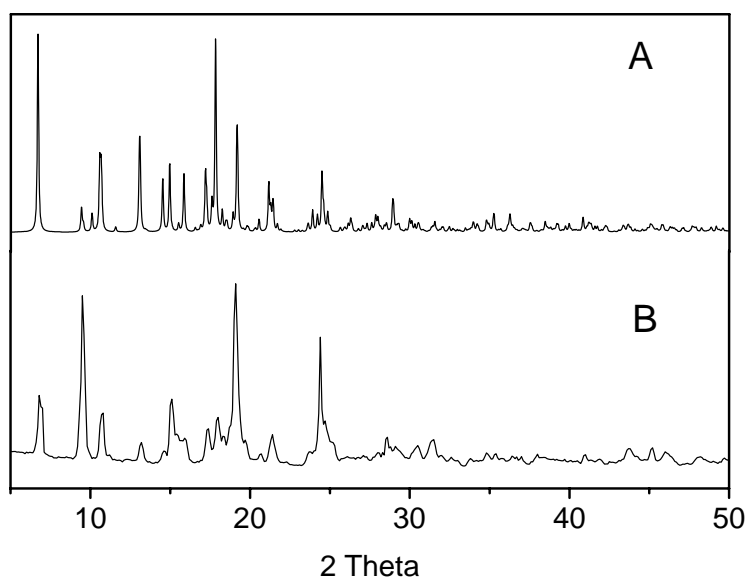

**Fig. S1.** Simulated (A) and measured (B) PXR patterns of **1**.

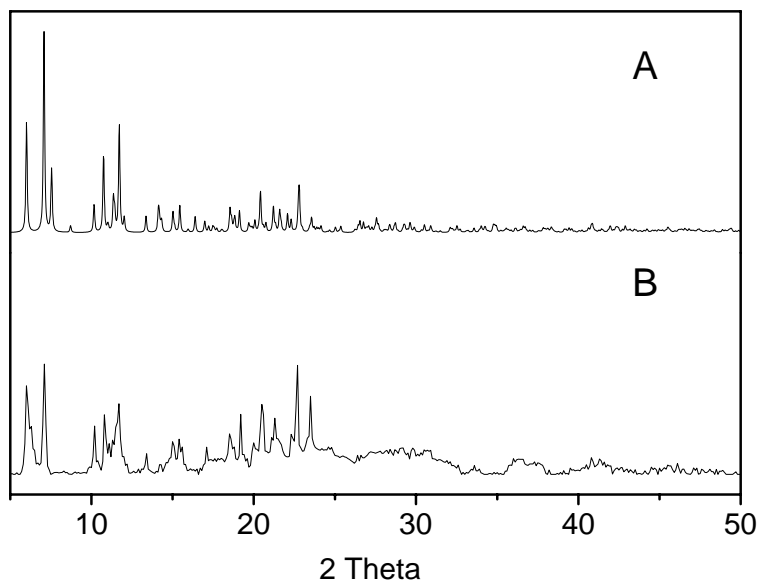

**Fig. S2.** Simulated (A) and measured (B) PXRD patterns of **2**.
